# Supplementary material for: Protective Effects of <em>Phyllanthus emblica</em> L. Extract against Renal Dysfunction, Angiogenesis, and Fibrosis Occur through the Regulation of PKCα Activation, Vegf, and TGF-β1 in a Diabetic Nephropathy Model
Source: Preprints.org preprint supplement (doi:10.20944/preprints202405.0545.v1), 2024-05-09
Supplement: Supplementary file 1 [file supplementary]

**Supplementary**

**A**

**
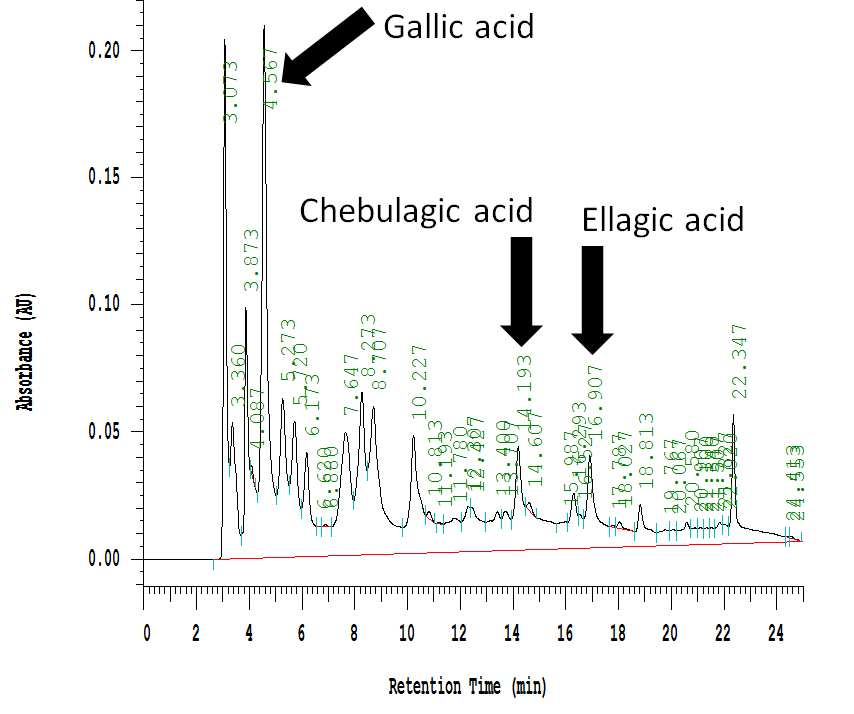
**

**B**

**C**


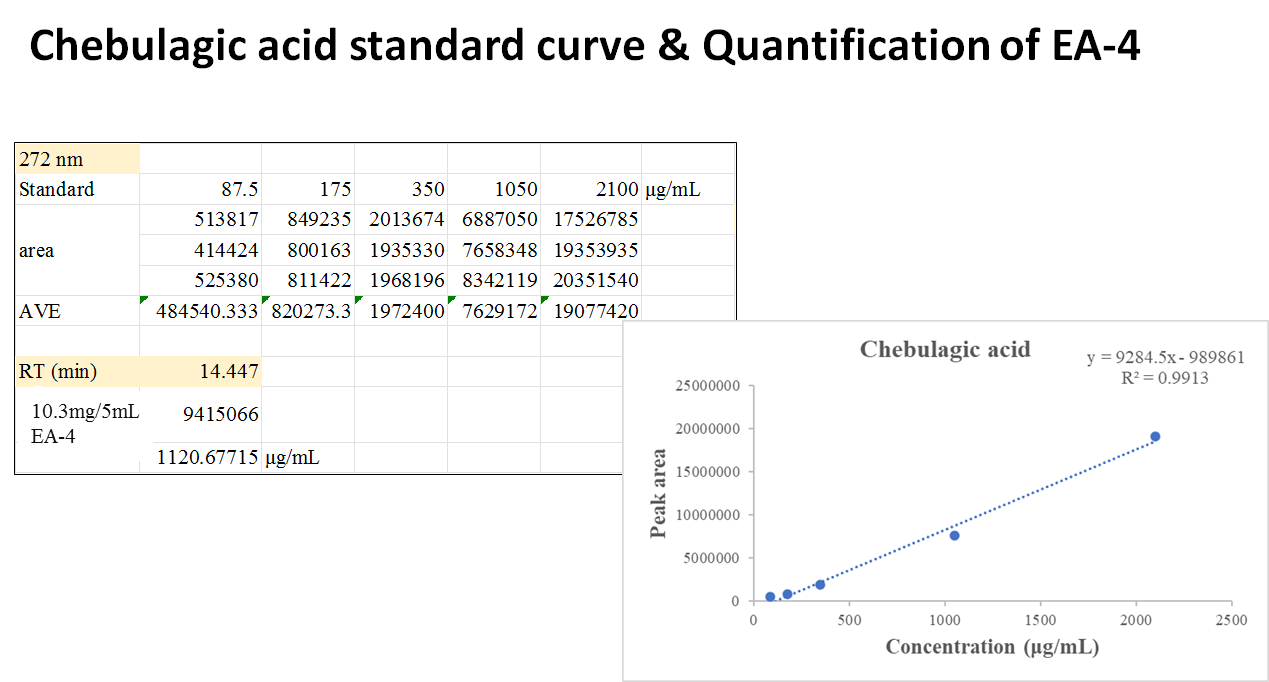


**Figure supplementary.** (**A**)~(**C**) High-performance liquid chromatography analysis of(**A**) 2500 ppm ethyl acetate of *Phyllanthus emblica* L. (EPE),(**B**)10.3 mg/5mL EA-4 of ethyl acetate of *Phyllanthus emblica* L. **(C)** Chebulagic acid standard curve and Quantification of EA-4.
